# Supplementary material
Source: PubMed Central journal article supplement (PMC4167631)

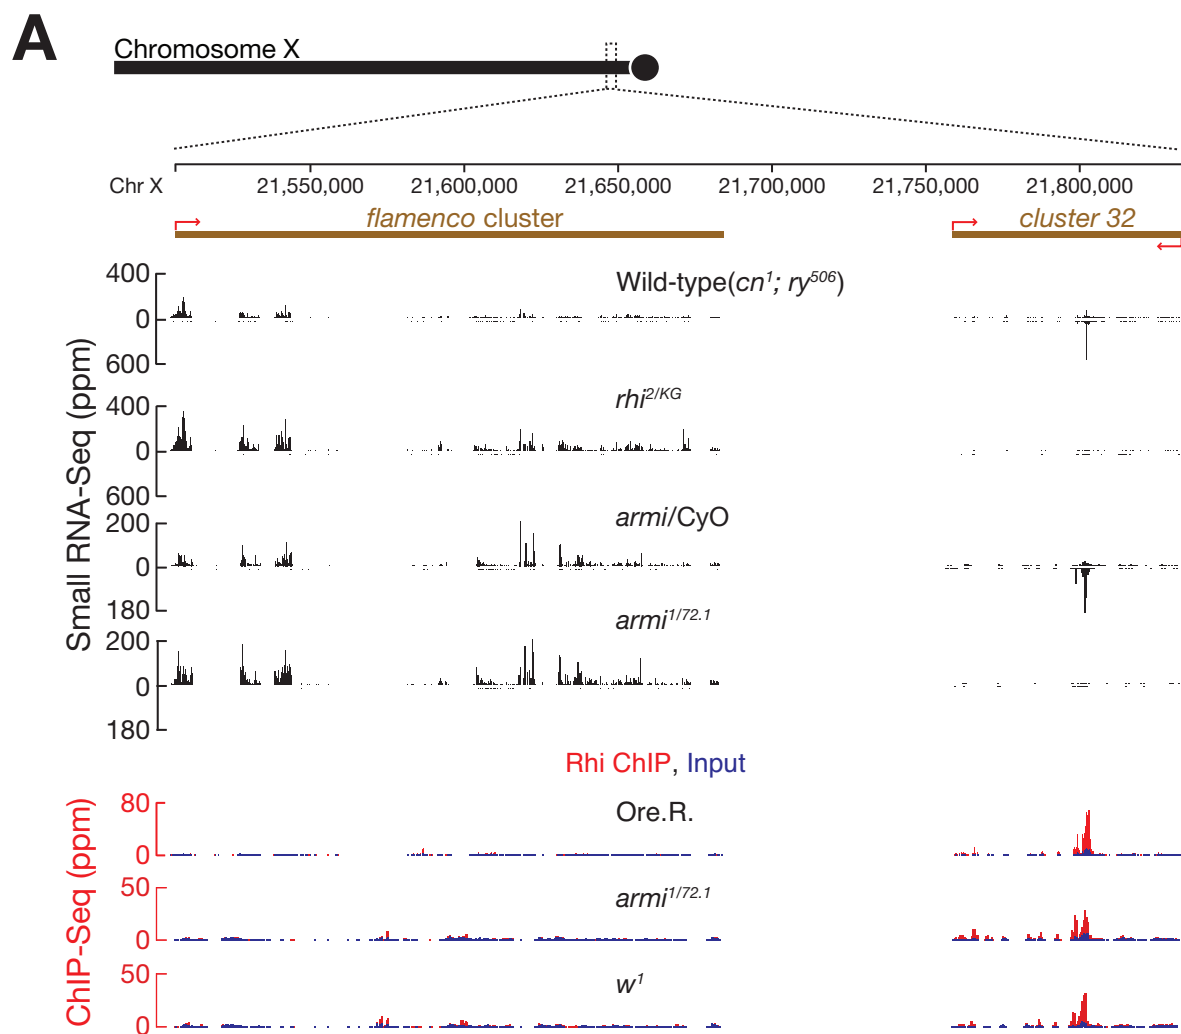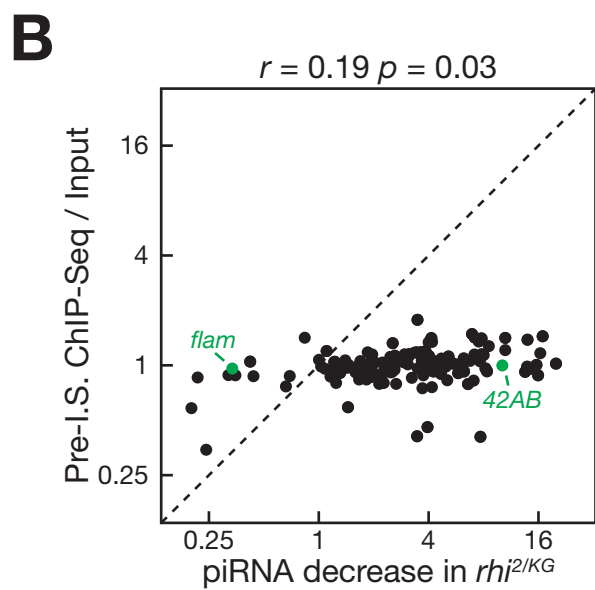

**A**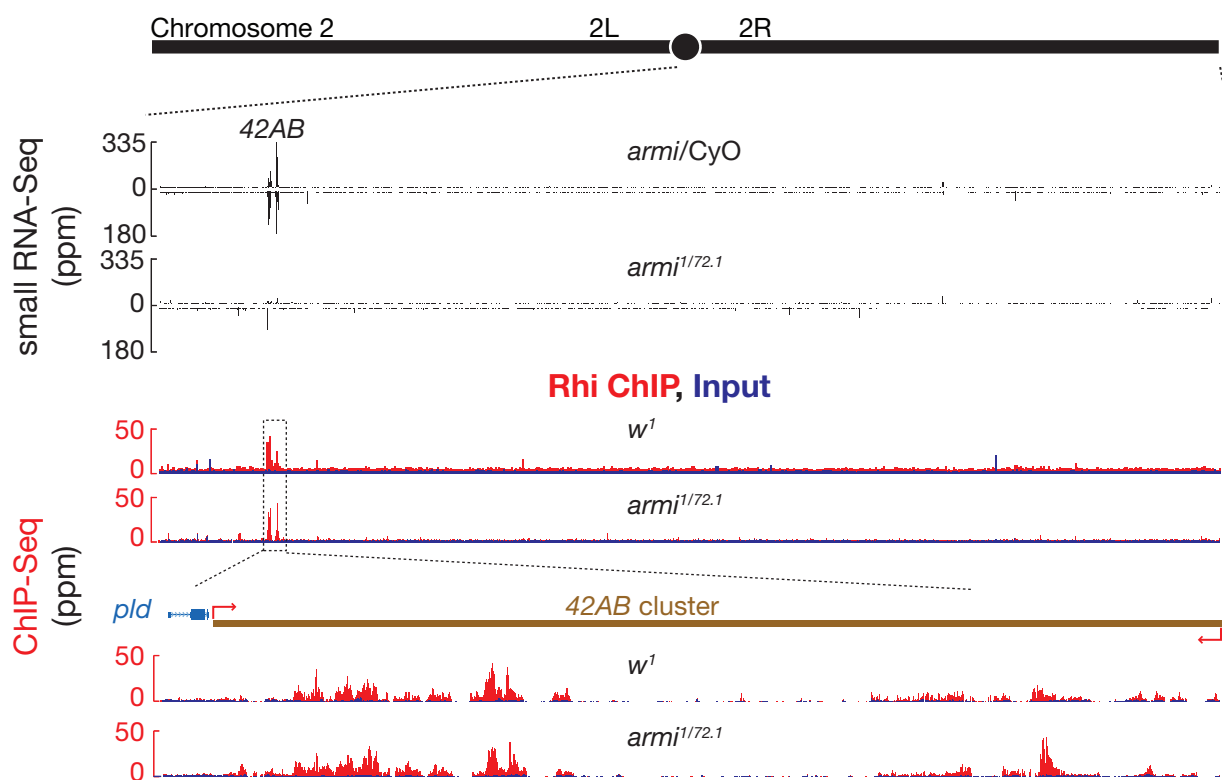**B**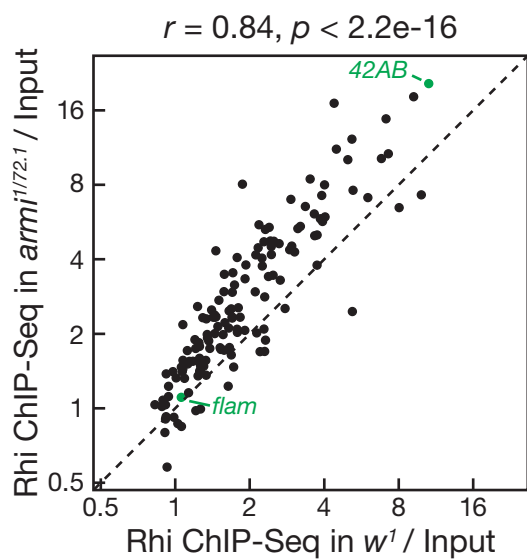**C**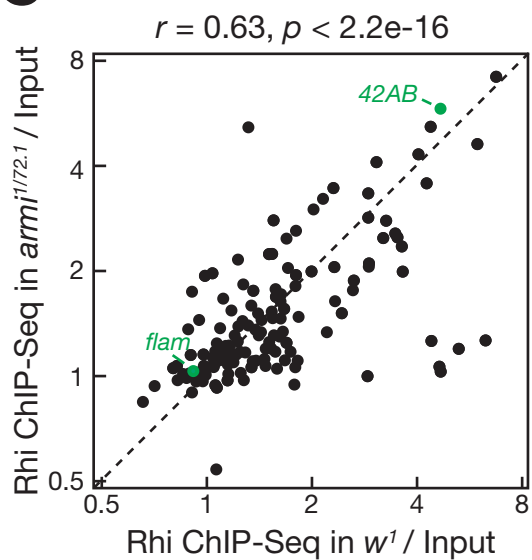

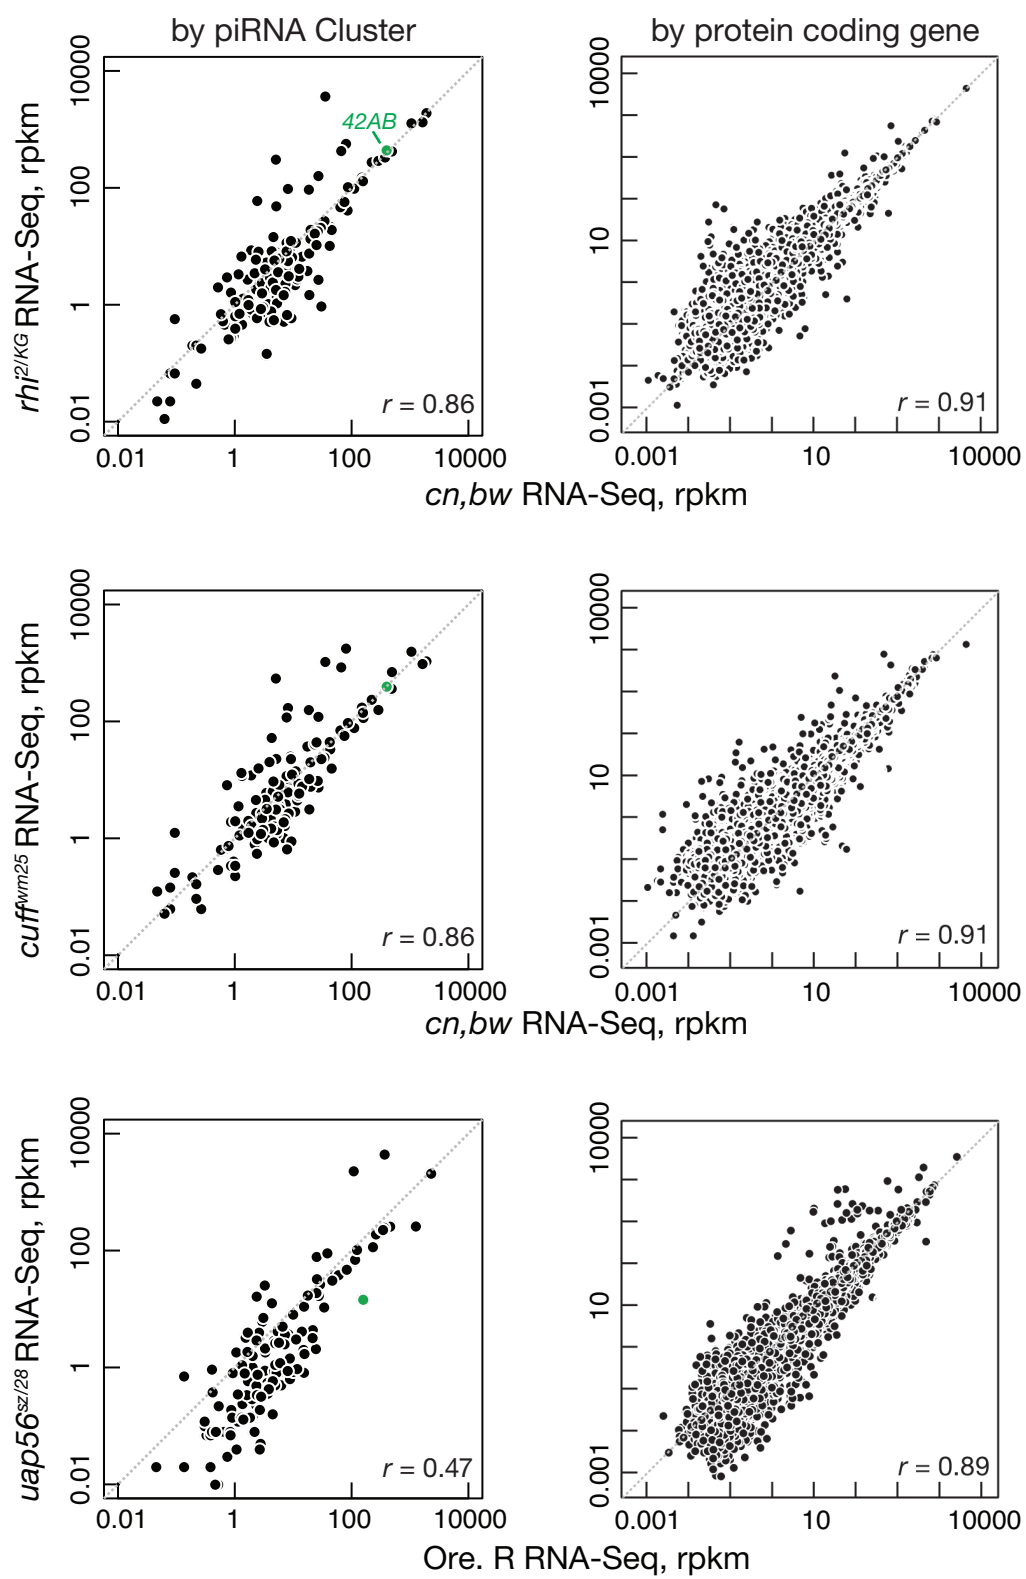

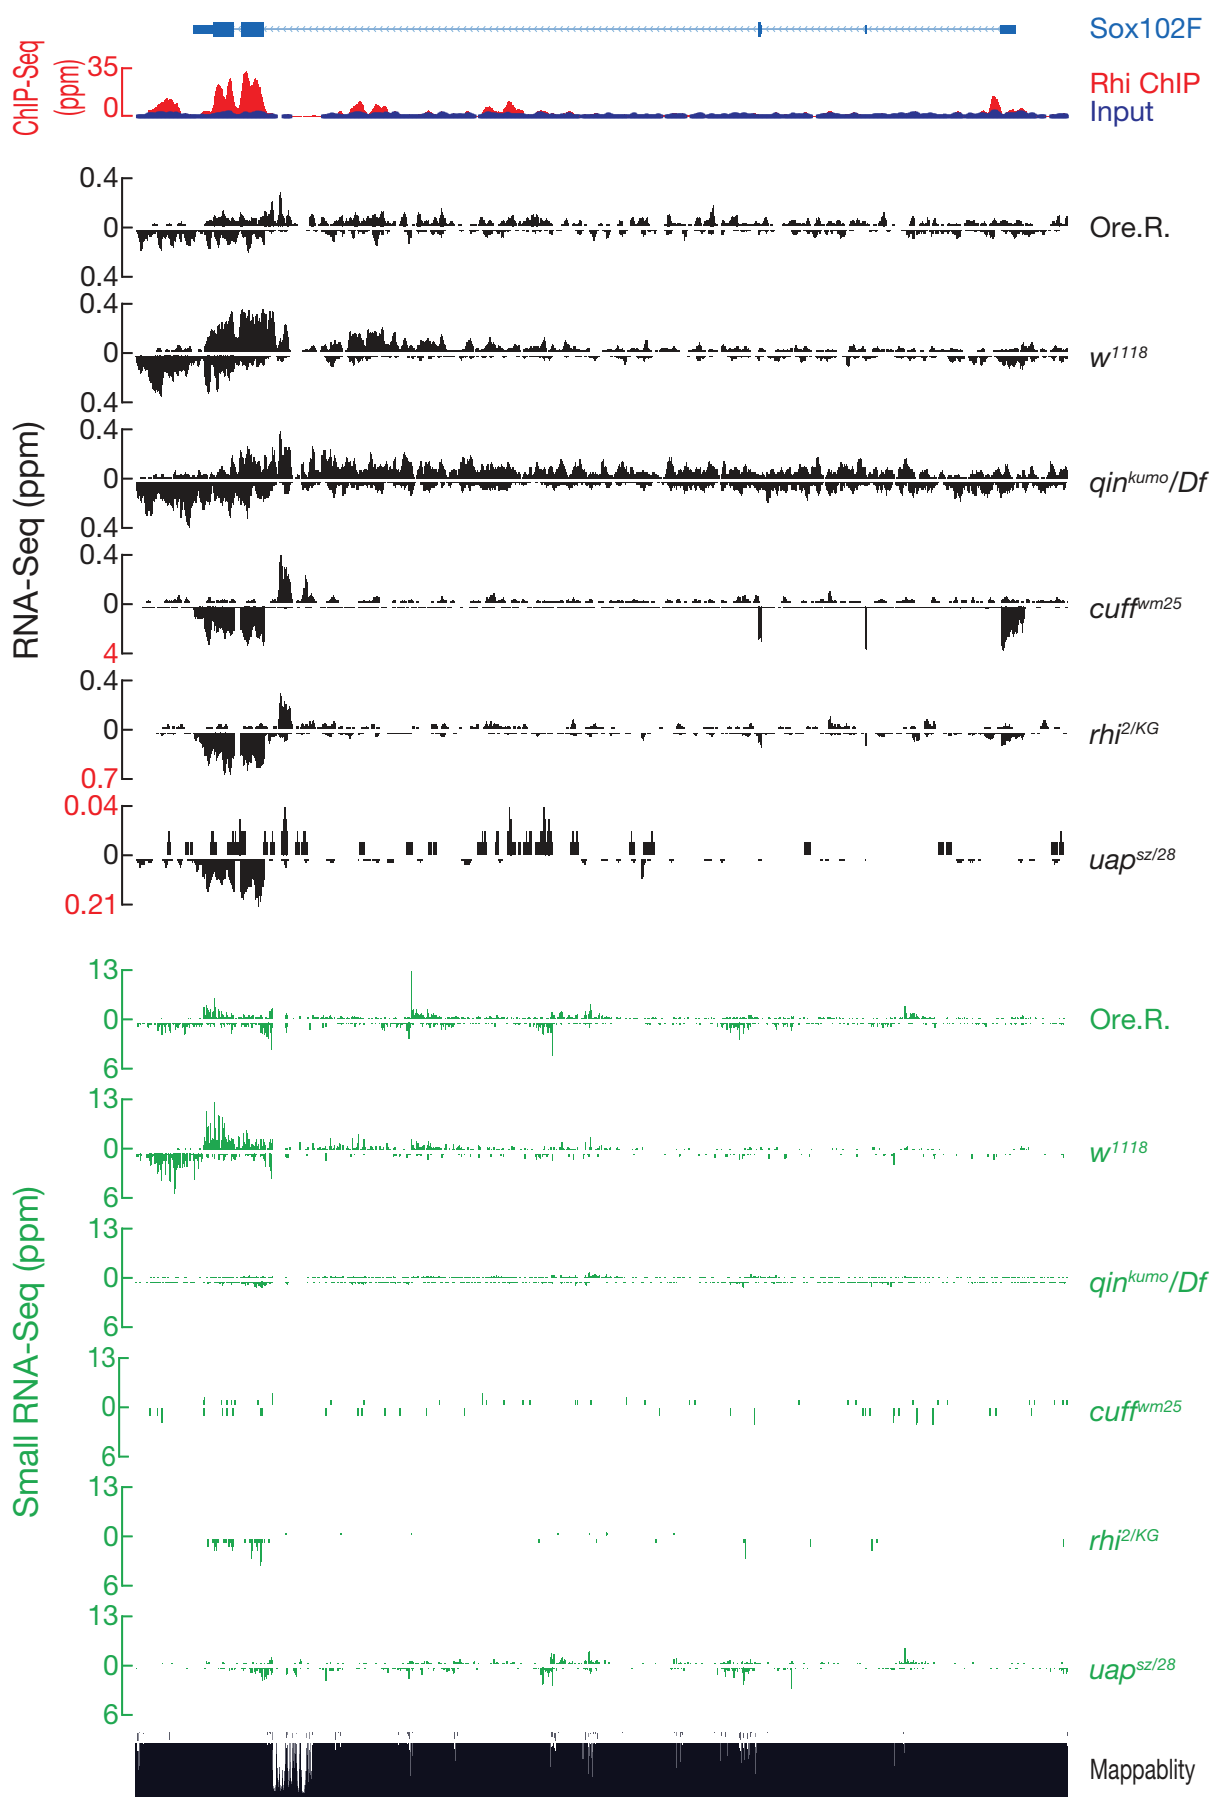

Zhang et al., Figure S5

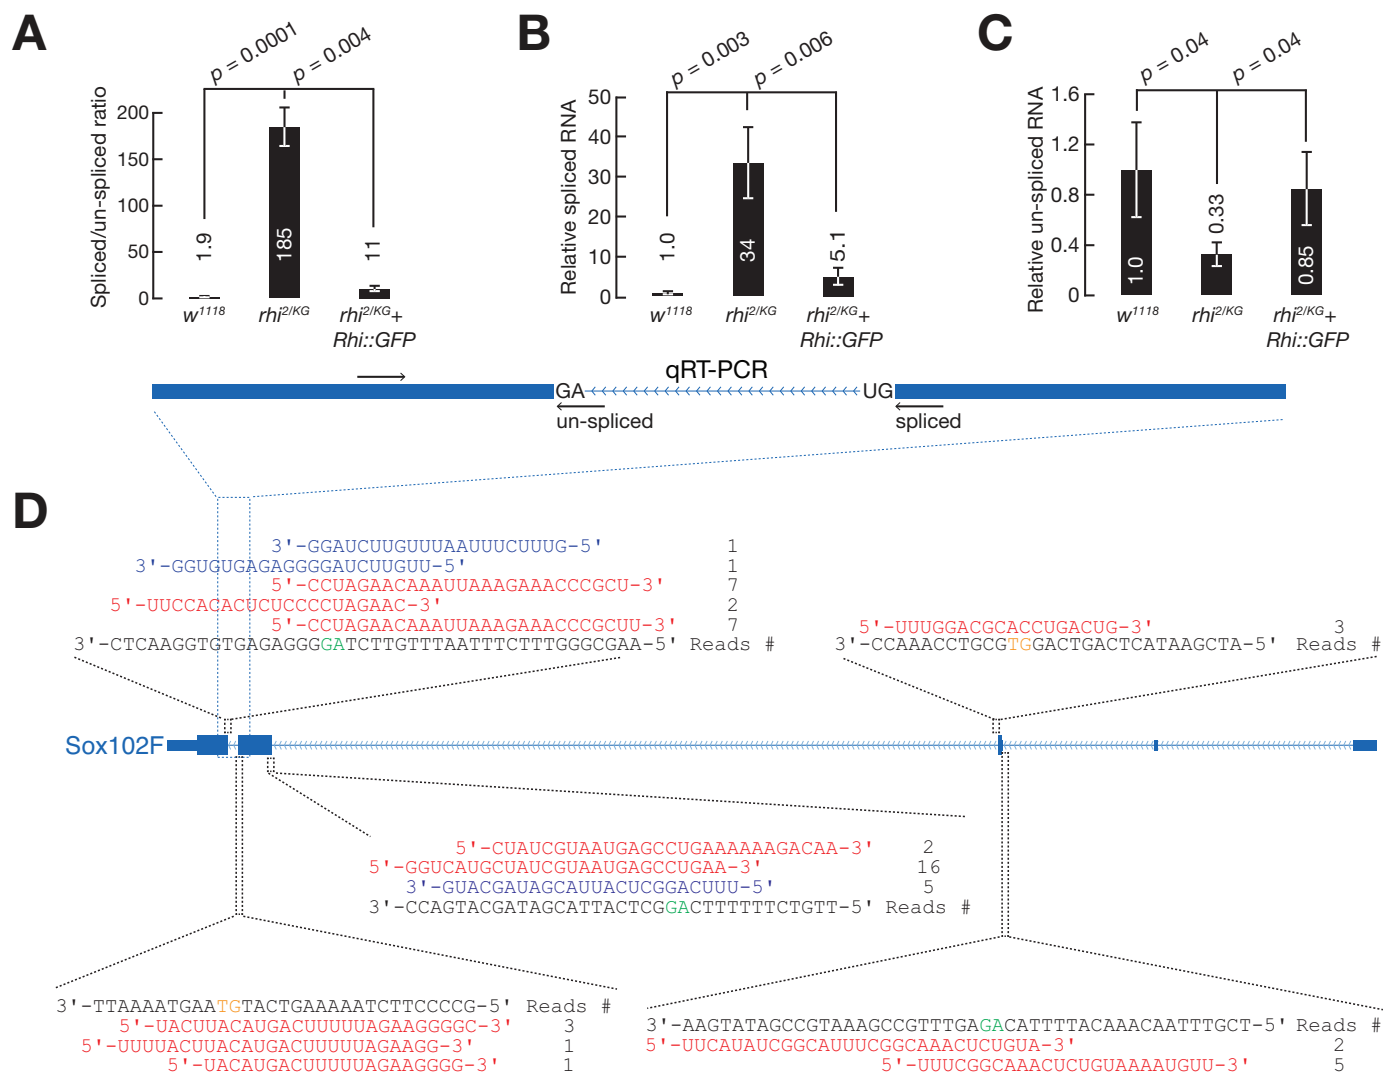

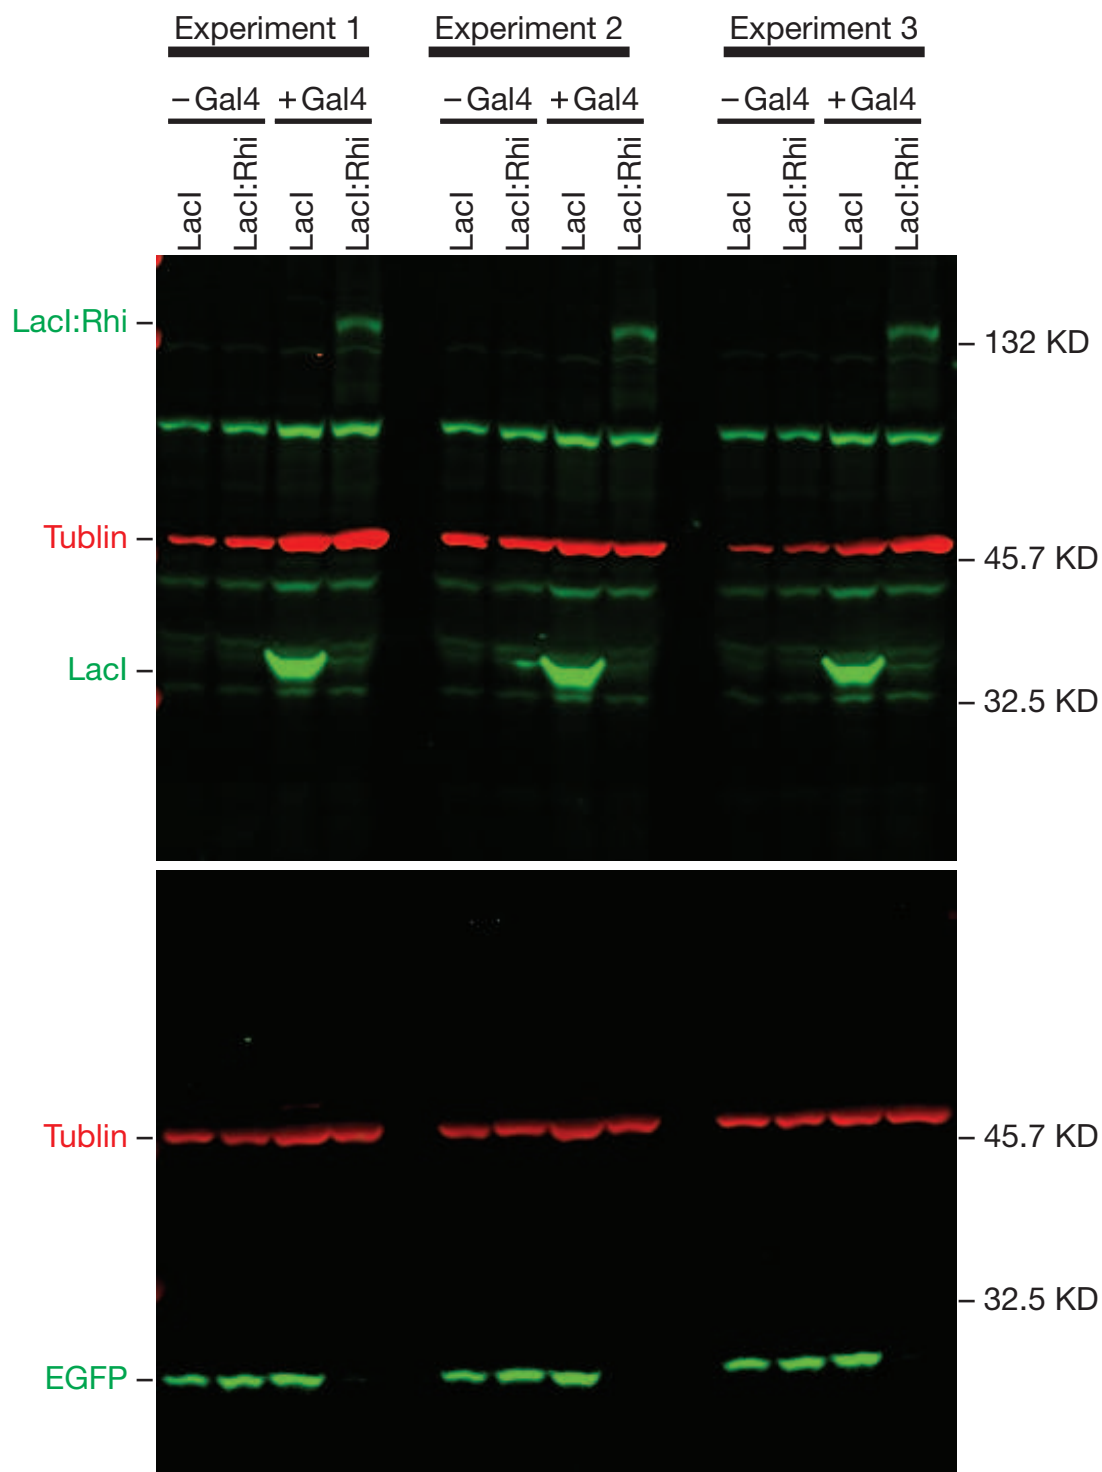

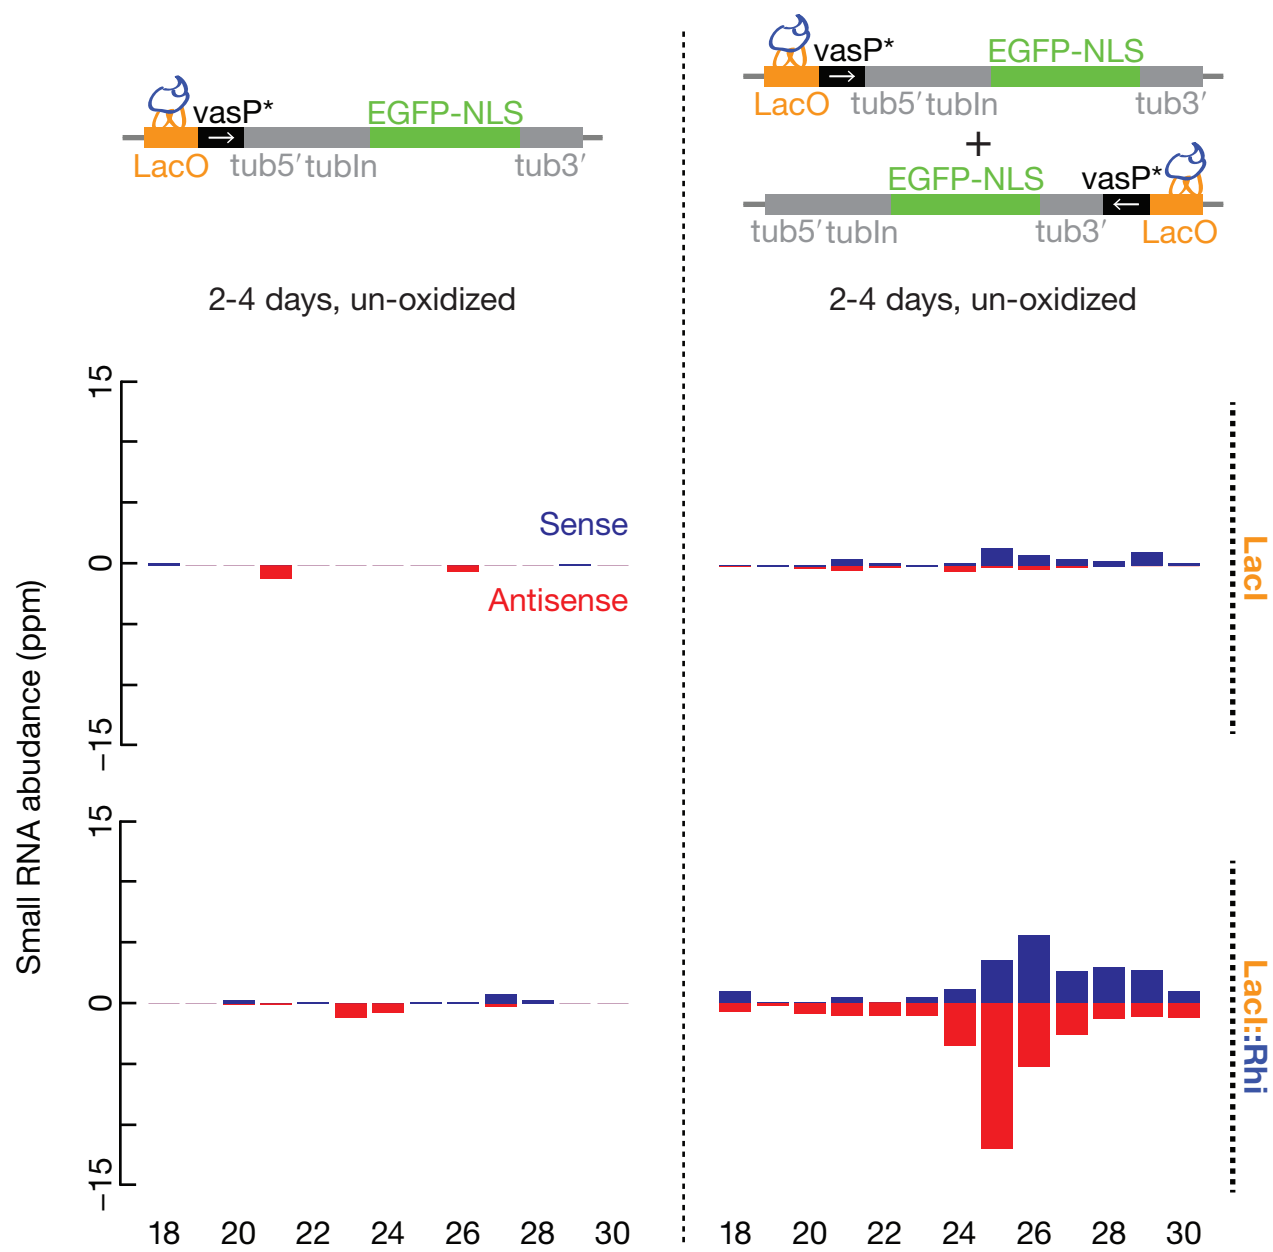

Supplement: NIHMS601566-supplement-02.pdf [file NIHMS601566-supplement-02.pdf]
